# Supplementary material for: Application of functional vincristine plus dasatinib liposomes to deletion of vasculogenic mimicry channels in triple-negative breast cancer
Source: PubMed Central journal article supplement (PMC4742200; doi:10.18632/oncotarget.5382), 2015-09-28
Supplement: oncotarget-06-36625-s001.pdf [file oncotarget-06-36625-s001.pdf]

## SUPPLEMENTARY TABLE

**Supplementary Table S1: Blood examination of tumor-bearing nude mice after treatment with varying formulations at day 22 after inoculation**

| Assay                                   | Physiological saline | Vincristine liposomes | Vincristine plus dasatinib liposomes | Functional vincristine plus dasatinib liposomes | Free vincristine |
|-----------------------------------------|----------------------|-----------------------|--------------------------------------|-------------------------------------------------|------------------|
| WBC <sup>a)</sup> (10 <sup>9</sup> /L)  | 5.57 ± 1.51          | 6.20 ± 1.35           | 7.80 ± 2.02                          | 5.57 ± 1.16                                     | 3.53 ± 0.46*     |
| RBC <sup>b)</sup> (10 <sup>12</sup> /L) | 7.75 ± 0.46          | 7.13 ± 0.77           | 7.81 ± 1.07                          | 8.30 ± 1.02                                     | 8.59 ± 2.96      |
| MCHC <sup>c)</sup> (g/L)                | 304.67 ± 1.53        | 299.00 ± 20.66        | 298.33 ± 2.31                        | 291.00 ± 12.53                                  | 299.67 ± 26.50   |
| RDW <sup>d)</sup> (%)                   | 14.10 ± 0.92         | 13.30 ± 0.50          | 13.33 ± 0.45                         | 13.23 ± 0.12                                    | 13.67 ± 1.98     |
| LYM <sup>e)</sup> (10 <sup>9</sup> /L)  | 0.93 ± 0.84          | 2.77 ± 2.25           | 1.13 ± 0.45                          | 1.77 ± 0.15                                     | 0.50 ± 0.20      |
| MID <sup>f)</sup> (10 <sup>9</sup> /L)  | 1.30 ± 0.78          | 1.33 ± 0.76           | 1.03 ± 0.42                          | 0.90 ± 0.10                                     | 0.50 ± 0.30      |

<sup>a)</sup>White blood cells; <sup>b)</sup>Red blood cells; <sup>c)</sup>Mean corpuscular hemoglobin concentration; <sup>d)</sup>Red cell distribution width;

<sup>e)</sup>Lymphocytes; <sup>f)</sup>Intermediate cell number. Data are presented as the mean ± SD (*n* = 3). \**p* < 0.05, vs. physiological saline.
